# Supplementary material for: Metabolomics of bacterial–fungal pairwise interactions reveal conserved molecular mechanisms
Source: Royal Society of Chemistry journal article supplement (doi:10.1039/d3an00408b), 2023-01-01
Supplement: d3an00408b1.xlsx [file d3an00408b1.xlsx]

## Sheet: Supplemental File 2
# MZmine2 Output for Select Features
# rows with suffix "falcon50" are from Dataset 4; all other rows are from Dataset 3
Putative Annotation	Pyripyropene O	ML-236A	Cyclopeptine
row m/z	527.285	307.19	281.128
row retention time	5.01666	5.65921	5.32306
cca_1_1_38_1_2291.mzML filtered smooth Peak area	120.23	0	0
cca_1_2_38_1_2305.mzML filtered smooth Peak area	62.4913	0	0
cca_1_3_38_1_2335.mzML filtered smooth Peak area	125.823	0	0
cca_falcon50_1_14_1_2628.mzML filtered smooth Peak area	61.659	0	0
cca_falcon50_2_14_1_2639.mzML filtered smooth Peak area	145.184	0	0
cca_falcon50_3_14_1_2646.mzML filtered smooth Peak area	98.1211	0	0
jb182_1_1_39_1_2292.mzML filtered smooth Peak area	24.8844	0	0
jb182_1_2_39_1_2310.mzML filtered smooth Peak area	29.0572	0	0
jb182_1_3_39_1_2330.mzML filtered smooth Peak area	22.7921	0	0
jb182_falcon50_1_15_1_2629.mzML filtered smooth Peak area	12.0246	0	0
jb182_falcon50_2_15_1_2640.mzML filtered smooth Peak area	53.3292	0	0
jb182_falcon50_3_15_1_2647.mzML filtered smooth Peak area	72.2775	0	0
jb418_1_1_41_1_2306.mzML filtered smooth Peak area	10.9218	0	0
jb418_1_2_41_1_2317.mzML filtered smooth Peak area	112.685	0	0
jb418_1_3_41_1_2325.mzML filtered smooth Peak area	110.622	0	0
jb5_1_1_40_1_2312.mzML filtered smooth Peak area	71.0702	0	0
jb5_1_2_40_1_2315.mzML filtered smooth Peak area	47.7836	0	0
jb5_1_3_40_1_2333.mzML filtered smooth Peak area	70.7049	0	0
jb5_falcon50_1_16_1_2630.mzML filtered smooth Peak area	96.5041	0	0
jb5_falcon50_2_16_1_2641.mzML filtered smooth Peak area	95.1564	0	0
jb5_falcon50_3_16_1_2648.mzML filtered smooth Peak area	83.2505	0	0
k12_1_1_42_1_2297.mzML filtered smooth Peak area	59.8612	0	0
k12_1_2_42_1_2313.mzML filtered smooth Peak area	118.009	0	0
k12_1_3_42_1_2334.mzML filtered smooth Peak area	29.9206	0	0
k12_falcon50_1_17_1_2631.mzML filtered smooth Peak area	56.7198	0	0
k12_falcon50_2_17_1_2642.mzML filtered smooth Peak area	88.6333	0	0
k12_falcon50_3_17_1_2649.mzML filtered smooth Peak area	113.157	0	0
meoh_h2o_37_1_2289.mzML filtered smooth Peak area	0	0	0
meoh_h2o_37_1_2296.mzML filtered smooth Peak area	0	0	0
meoh_h2o_37_1_2302.mzML filtered smooth Peak area	0	0	0
meoh_h2o_37_1_2308.mzML filtered smooth Peak area	0	0	0
meoh_h2o_37_1_2314.mzML filtered smooth Peak area	0	0	0
meoh_h2o_37_1_2320.mzML filtered smooth Peak area	0	0	0
meoh_h2o_37_1_2326.mzML filtered smooth Peak area	0	0	0
meoh_h2o_37_1_2332.mzML filtered smooth Peak area	0	0	0
meoh_h2o_37_1_2338.mzML filtered smooth Peak area	0	0	0
meoh_water_falcon50_1_13_1_2624.mzML filtered smooth Peak area	5.04766	0	0
meoh_water_falcon50_1_13_1_2627.mzML filtered smooth Peak area	24.6198	0	0
meoh_water_falcon50_2_13_1_2638.mzML filtered smooth Peak area	2.72155	0	0
meoh_water_falcon50_3_13_1_2645.mzML filtered smooth Peak area	47.2037	0	0
pen12_1_1_43_1_2311.mzML filtered smooth Peak area	1326.03	0	0
pen12_1_2_43_1_2339.mzML filtered smooth Peak area	1322.56	0	0
pen12_1_3_43_1_2340.mzML filtered smooth Peak area	1851.59	0	0
pen12_big_falcon50_1_19_1_2633.mzML filtered smooth Peak area	27929.4	3049.12	4572.02
pen12_big_falcon50_2_19_1_2644.mzML filtered smooth Peak area	34718.6	3642.63	5398.6
pen12_big_falcon50_3_19_1_2651.mzML filtered smooth Peak area	20386.5	3198.24	4946.76
pen12_jb182_1_1_44_1_2309.mzML filtered smooth Peak area	1531.09	0	0
pen12_jb182_1_2_44_1_2322.mzML filtered smooth Peak area	743.937	0	0
pen12_jb182_1_3_44_1_2323.mzML filtered smooth Peak area	313.783	0	0
pen12_jb418_1_1_46_1_2304.mzML filtered smooth Peak area	849.46	0	0
pen12_jb418_1_2_46_1_2319.mzML filtered smooth Peak area	1078.93	0	0
pen12_jb418_1_3_46_1_2324.mzML filtered smooth Peak area	1087.54	0	0
pen12_jb5_1_1_45_1_2293.mzML filtered smooth Peak area	1926.25	0	0
pen12_jb5_1_2_45_1_2299.mzML filtered smooth Peak area	5133.77	0	0
pen12_jb5_1_3_45_1_2329.mzML filtered smooth Peak area	1045.85	0	0
pen12_k12_1_1_47_1_2298.mzML filtered smooth Peak area	2268.25	0	0
pen12_k12_1_2_47_1_2300.mzML filtered smooth Peak area	1006.69	0	0
pen12_k12_1_3_47_1_2307.mzML filtered smooth Peak area	1368.5	0	0
